# Supplementary material for: Cesium-lead-bromide perovskites with balanced stoichiometry enabled by sodium-bromide doping for all-vacuum deposited silicon-based light-emitting diodes
Source: Royal Society of Chemistry journal article supplement (doi:10.1039/d0tc04643d), 2020-12-22
Supplement: d0tc04643d1.pdf [file d0tc04643d1.pdf]

## Supporting information

### **Cesium-lead-bromine Perovskites with Balanced Stoichiometry Enabled by Sodium-bromide Doping for All-Vacuum Deposited Silicon-based Light-emitting Diodes**

*Fengyou Qin<sup>#</sup>, Hongjun Tian<sup>#</sup>, Minxing Yan, Yanjun Fang<sup>\*</sup>, and Deren Yang<sup>\*</sup>*

State Key Laboratory of Silicon Materials and School of Materials Science and Engineering, Zhejiang  
University, Hangzhou 310027, P. R. China.

\*E-mail: jkfang@zju.edu.cn; mseyang@zju.edu.cn

<sup>#</sup>F.Q. and H.T. contributed equally to this work

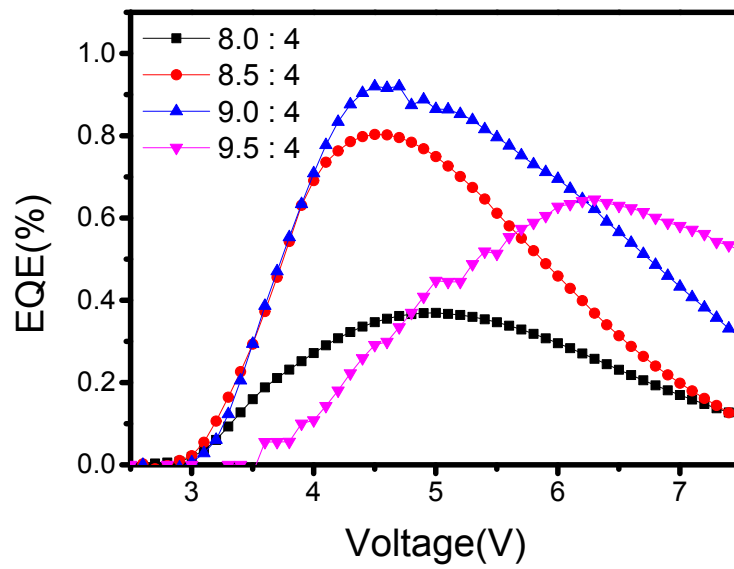

**Figure S1.** EQE of PeLED devices with different CsBr/PbBr<sub>2</sub> molar ratios under different working voltages

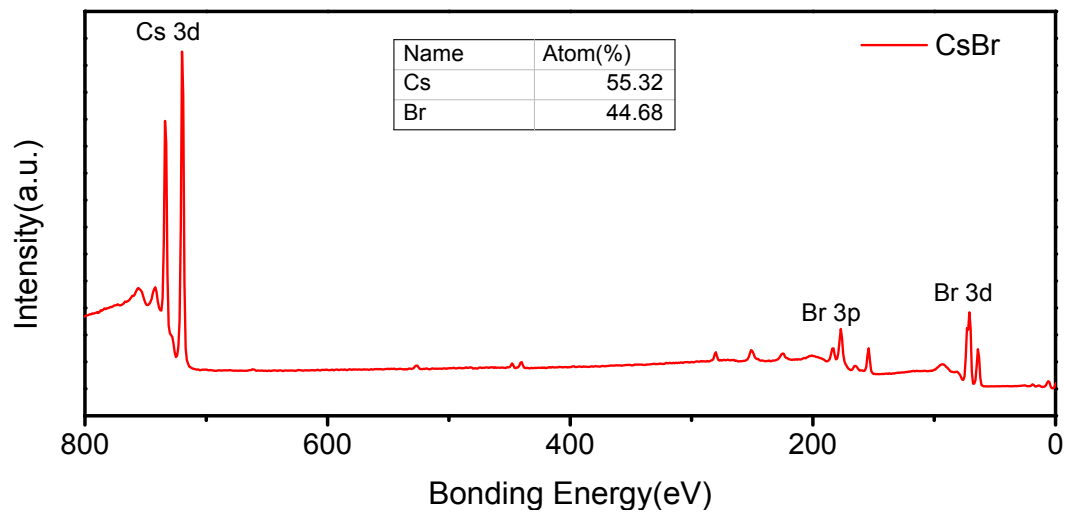

**Figure S2.** XPS full spectra of the CsBr film prepared by VVD method

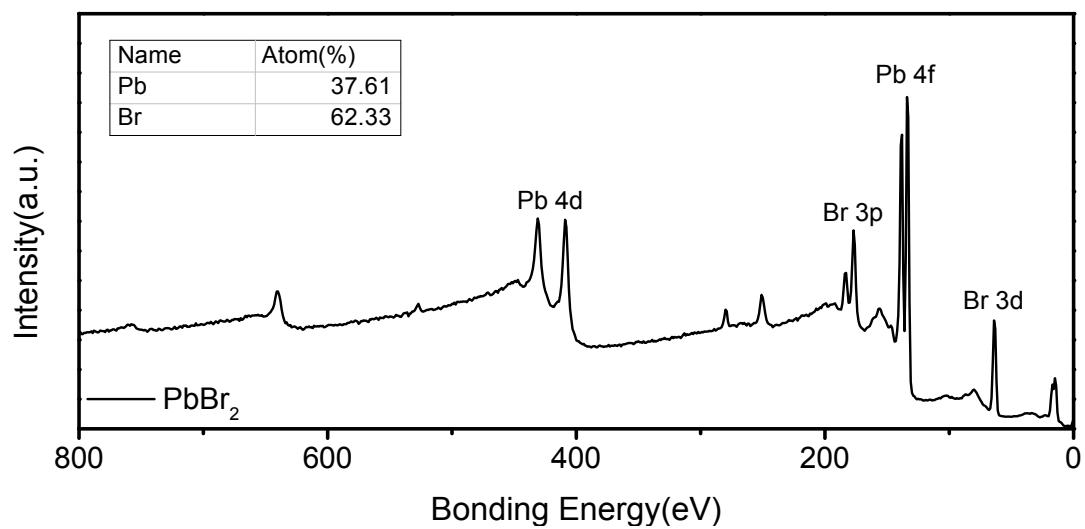

**Figure S3.** XPS full spectra of the PbBr<sub>2</sub> film prepared by VVD method

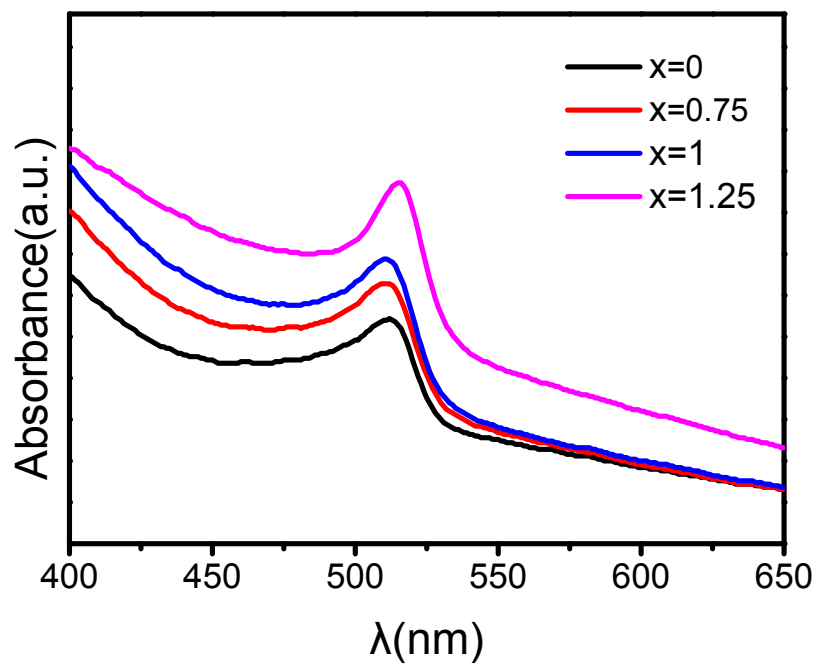

**Figure S4.** UV-vis absorbance spectra of films with different CsBr/PbBr<sub>2</sub>/NaBr molar ratios

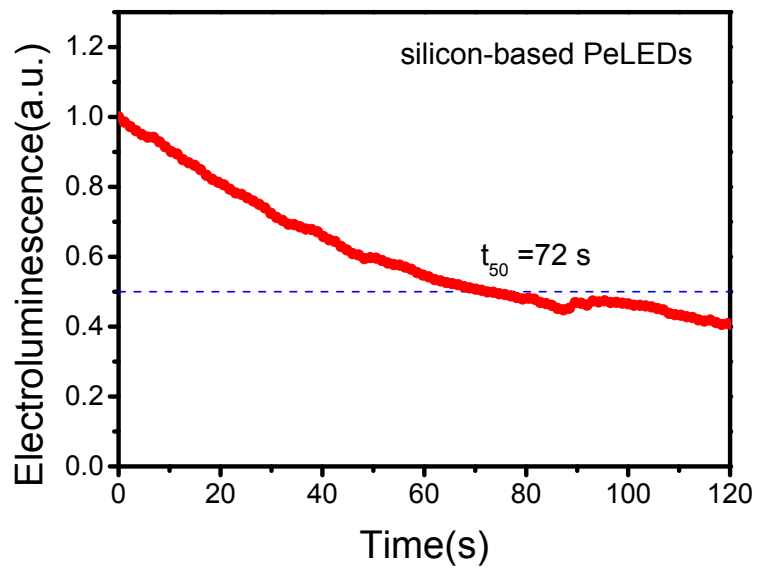

**Figure S5.** Electroluminescence intensity of silicon-based PeLEDs with NaBr doping as a function of operating time under constant biasing
